# Supplementary material for: Hepatoprotective Effect of Carob Pulp Flour (Ceratonia siliqua L.) Extract Obtained by Optimized Microwave-Assisted Extraction
Source: MDPI journal article supplement (doi:10.3390/pharmaceutics14030657), 2022-03-16
Supplement: s1 [file s1]

# Supplementary Materials: Hepatoprotective Effect of Carob Pulp Flour (*Ceratonia siliqua* L.) Extract Obtained by Optimized Microwave-Assisted Extraction

Nikola Martić, Jana Zahorec, Nebojša Stilinović, Bojana Andrejić-Višnjić, Branimir Pavlić, Nebojša Kladar, Dragana Šoronja-Simović, Zita Šereš, Miodrag Vujčić, Olga Horvat and Aleksandar Rašković

**Table S1.** Animal body mass (mean  $\pm$  SD; n=7) in animals treated with saline and carob extract.

|        | <b>ConS</b>      | <b>ConP</b>      | <b>CE100</b>     | <b>CE100+P</b>   | <b>CE200</b>     | <b>CE200+P</b>   |
|--------|------------------|------------------|------------------|------------------|------------------|------------------|
| BM (g) | 37.00 $\pm$ 1.41 | 37.86 $\pm$ 3.08 | 32.43 $\pm$ 2.88 | 39.86 $\pm$ 3.67 | 34.14 $\pm$ 2.97 | 37.71 $\pm$ 2.06 |
